# Supplementary material for: Sources of Submicrometre Particles Near a Major International Airport
Source: Copernicus journal article supplement (doi:10.5194/acp-2017-150), 2017-04-26
Supplement: Supplementary file 1 [file acp-2017-150-supplement.pdf]

1  
2  
3  
4  
5  
6  
7  
8  
9  
10  
11  
12  
13  
14  
15  
16  
17  
18

**SUPPLEMENTARY MATERIAL**

**SOURCES OF SUBMICROMETRE PARTICLES NEAR A  
MAJOR INTERNATIONAL AIRPORT**

**Mauro Masiol, Roy M. Harrison, Tuan V. Vu, David C.S. Beddows**

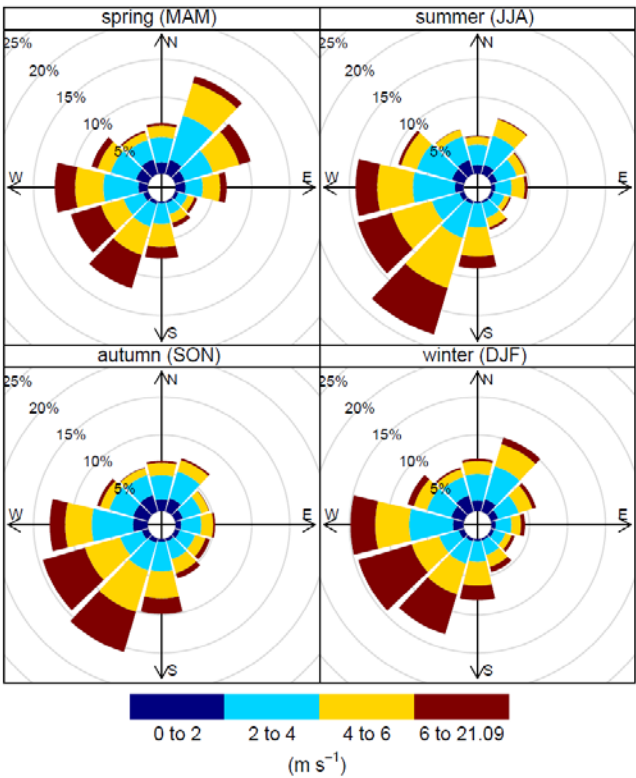

**Figure SI1.** Seasonal wind roses calculated from data collected at Heathrow (MetOffice station 708) over the 2005/2012 period.

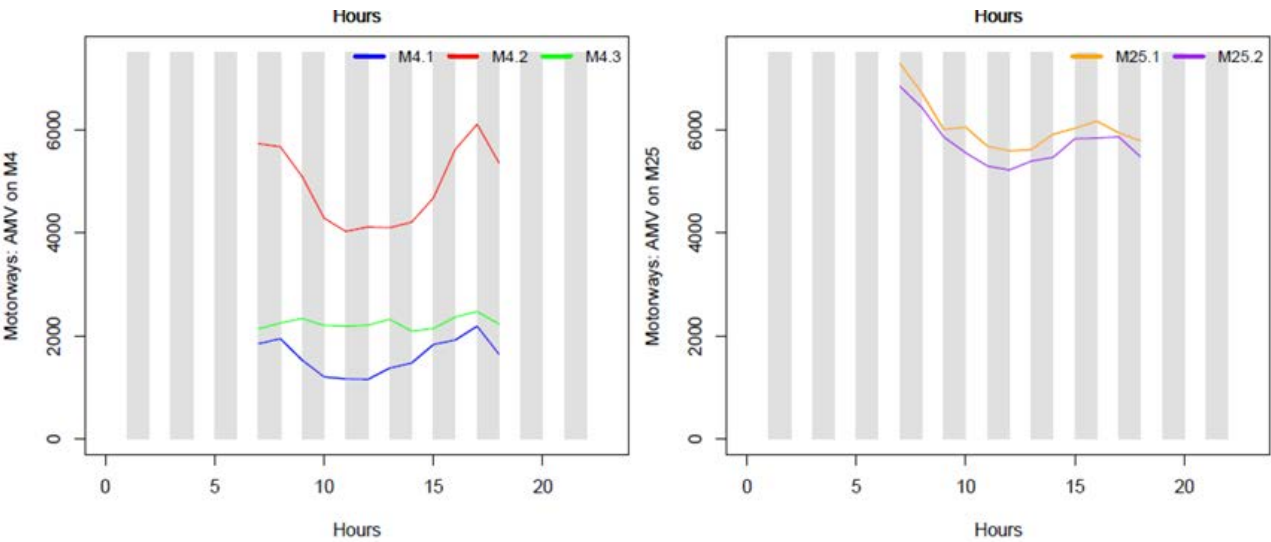

**Figure SI2.** Hourly traffic count data for the motorways close to LHR. Data are provided by the UK Department for Transport, which commissions manual counts of traffic for a number of count points every year. The counts take place between 7 am and 7 pm; each road link is counted a maximum of one day in a year (adapted from Masiol et al., 2015).

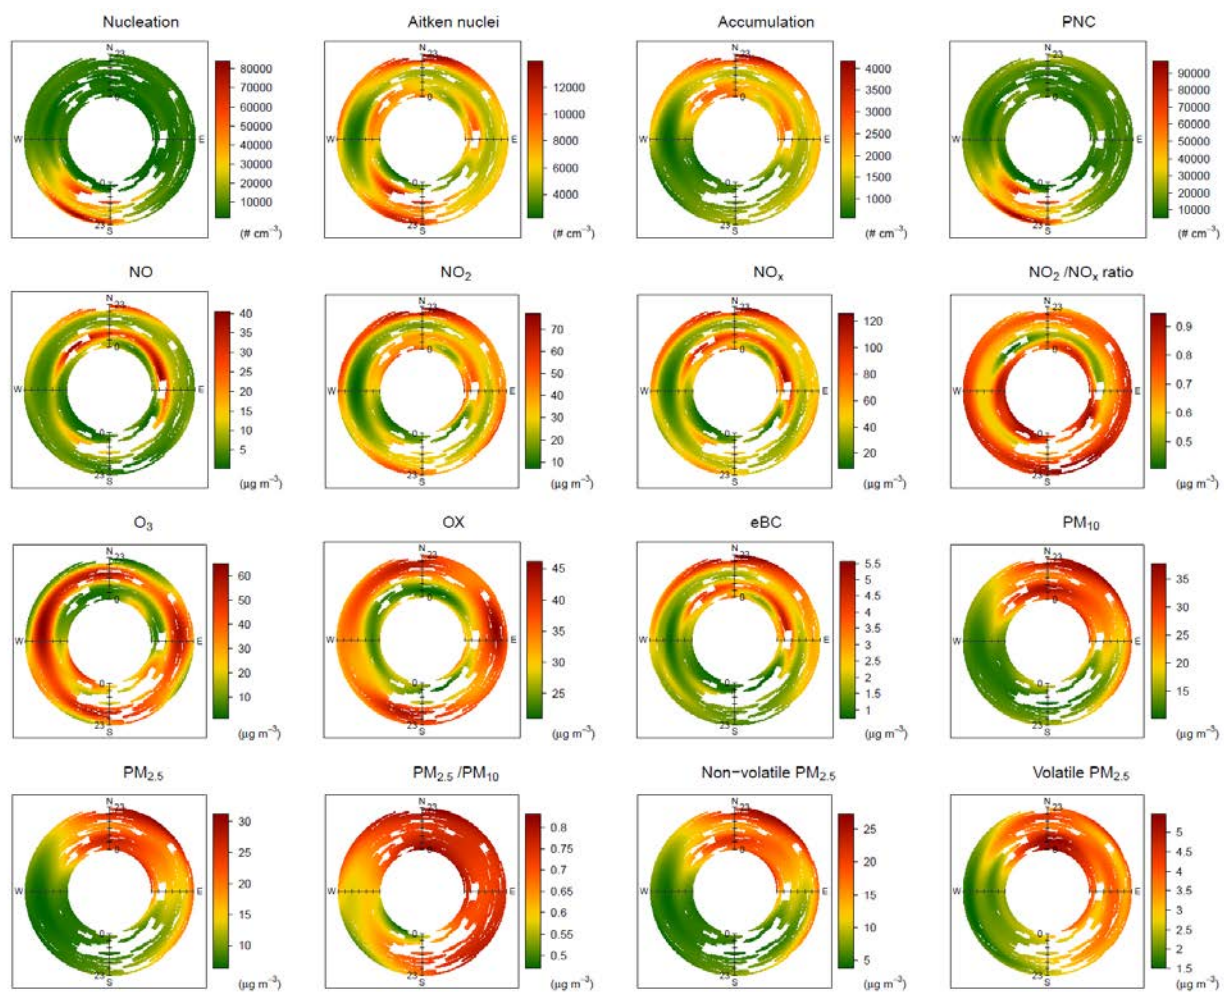

33

34 **Figure SI3.** Polar Annuli calculated from data collected during the warm season.

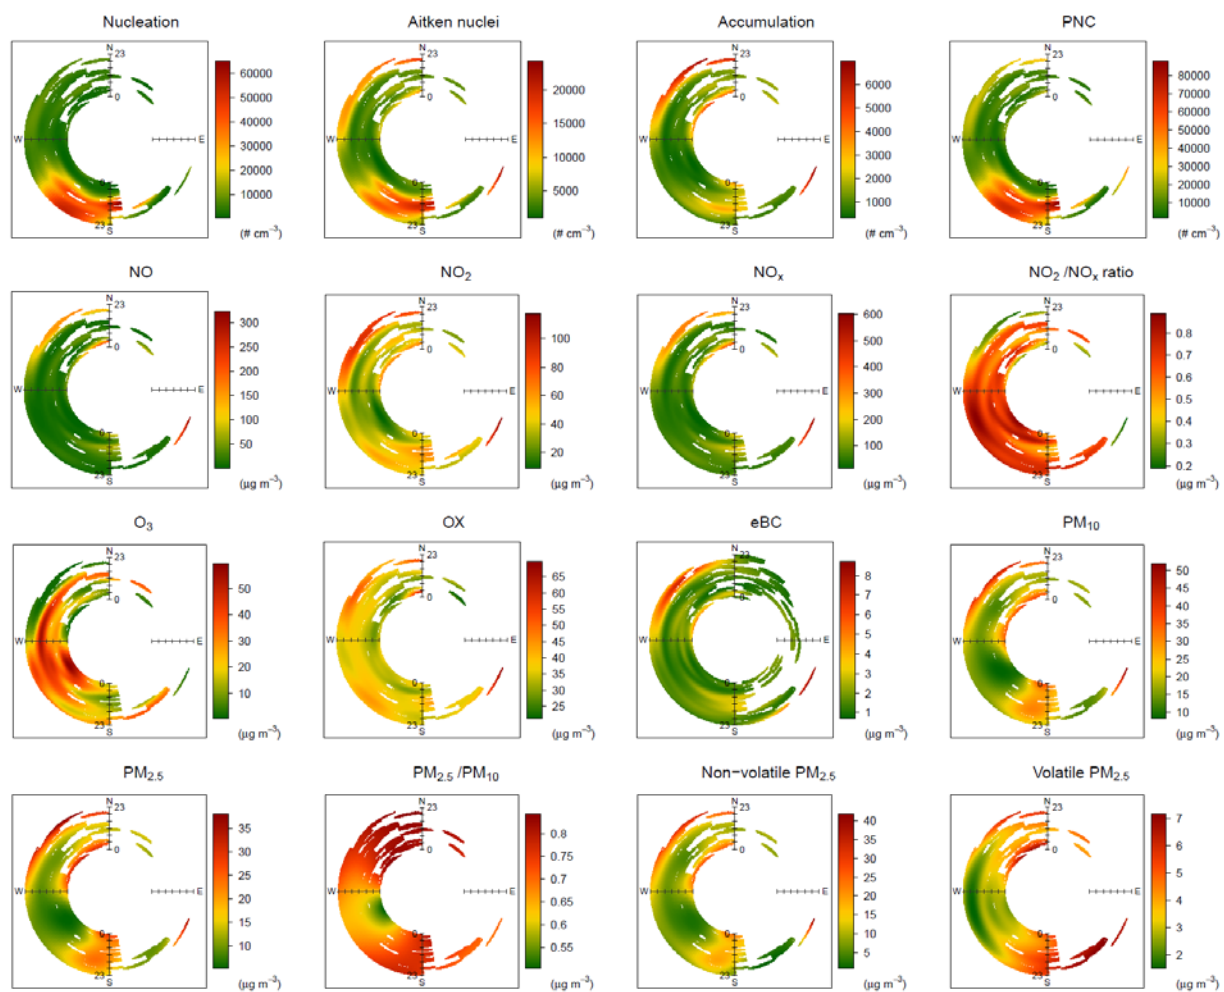

**Figure SI4.** Polar Annuli calculated from data collected during the cold season.

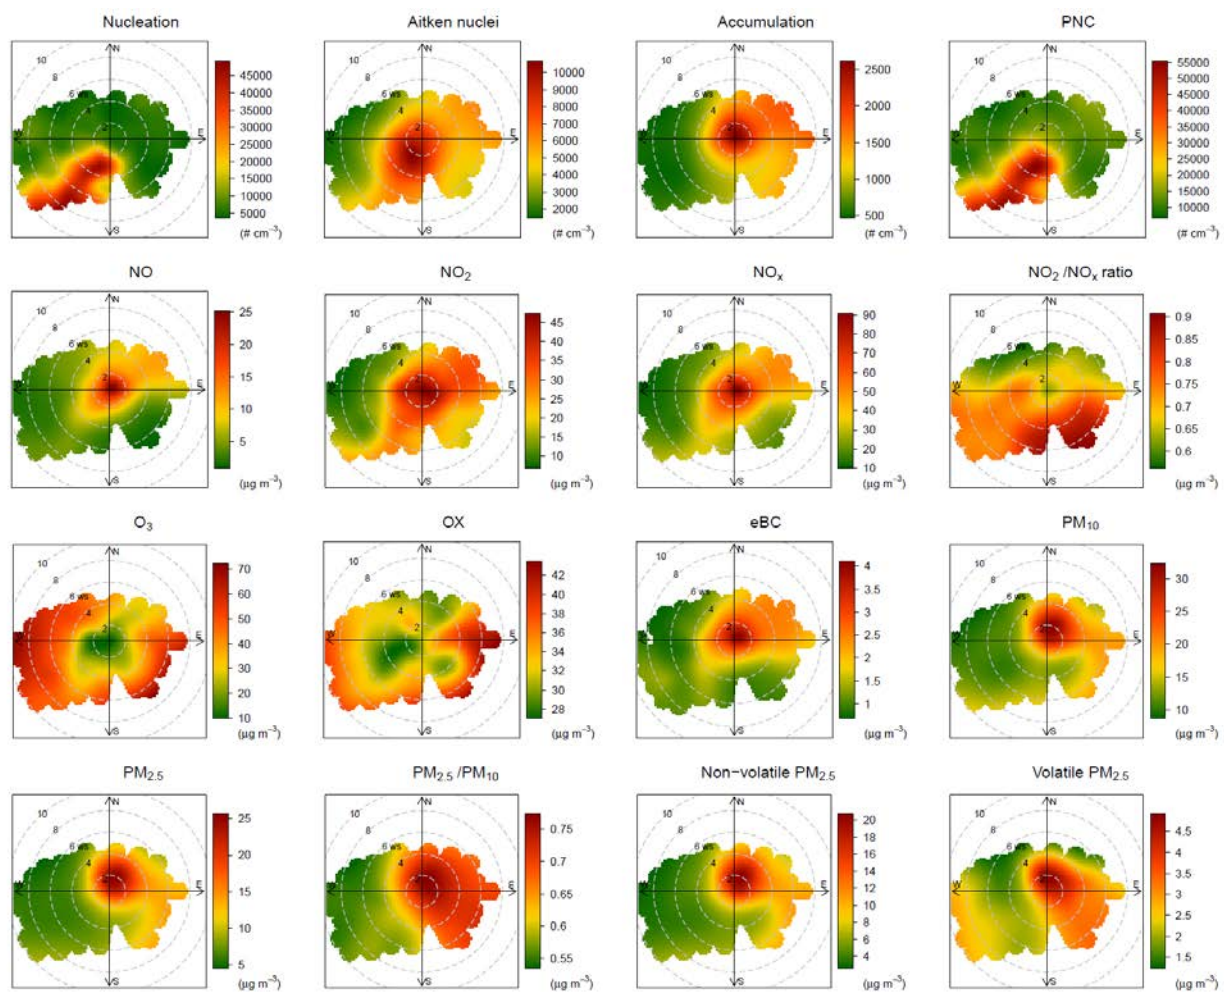

**Figure SI5.** Polar Plots calculated over from collected during the cold season.

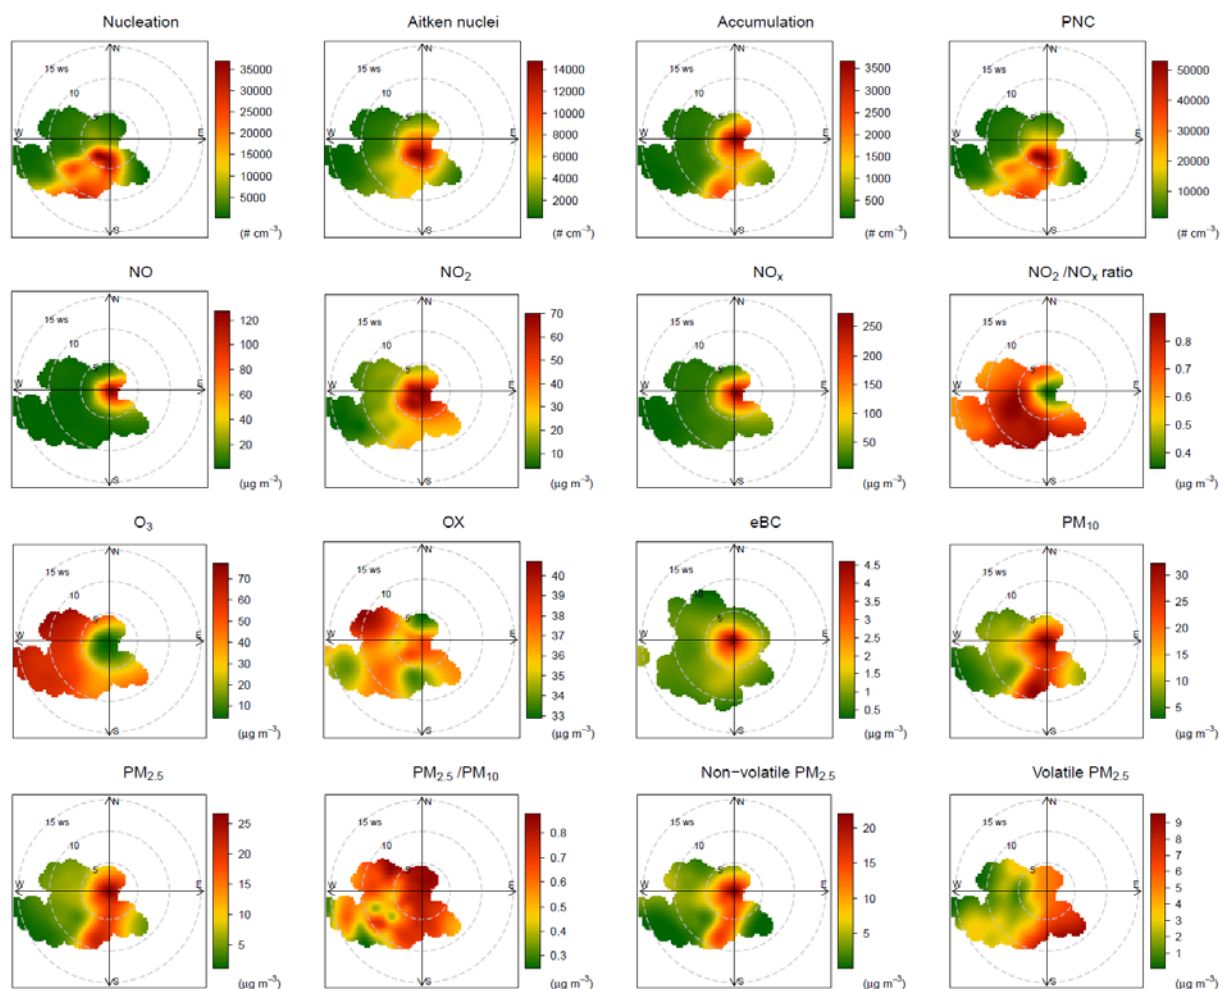

**Figure SI6.** Polar Plots calculated from data collected during the cold season.

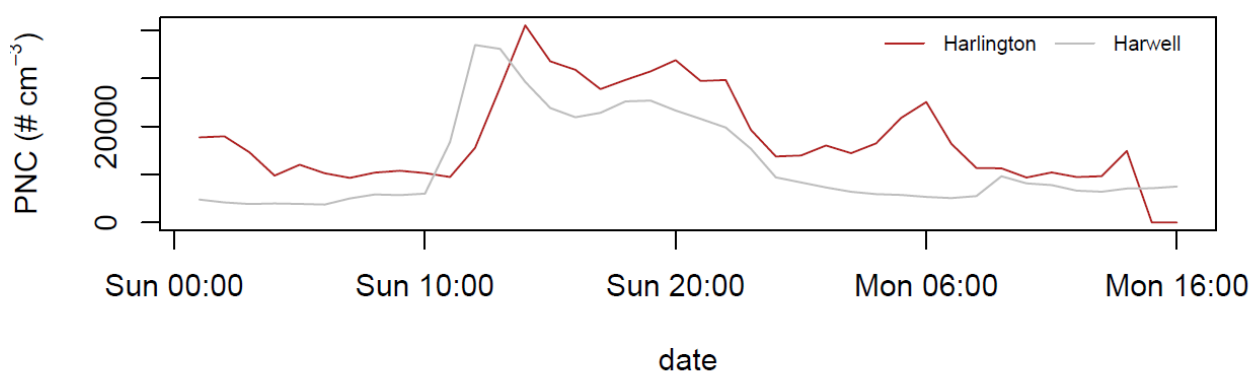

**Figure SI7.** Time series of total PNC measured at Harwell and Harlington during the regional nucleation episode.
